# Supplementary material for: Two of Them Do It Better: Novel Serum Biomarkers Improve Autoimmune Hepatitis Diagnosis
Source: PubMed Central journal article supplement (PMC4573979; doi:10.1371/journal.pone.0137927), 2015-09-16

S3 Fig.

A

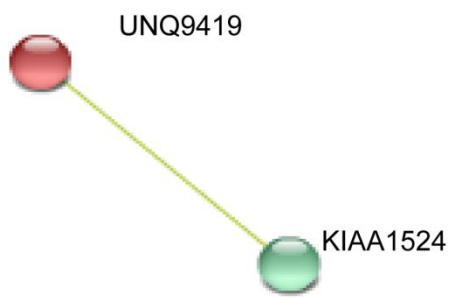

B

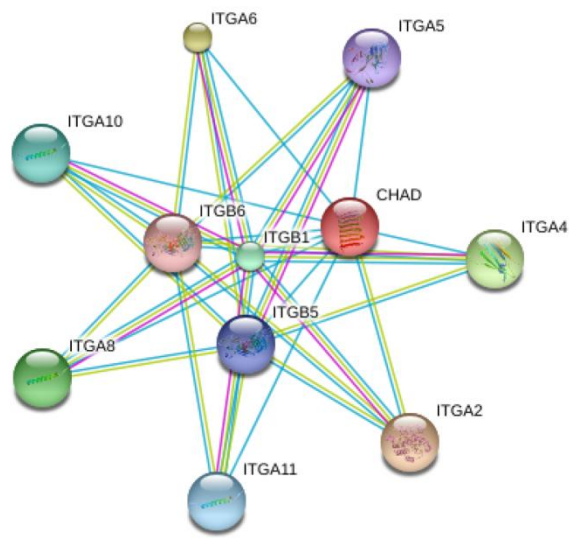

Supplement: pone.0137927.s003.pdf [file pone.0137927.s003.pdf]
