# Supplementary material for: Two of Them Do It Better: Novel Serum Biomarkers Improve Autoimmune Hepatitis Diagnosis
Source: PubMed Central journal article supplement (PMC4573979; doi:10.1371/journal.pone.0137927), 2015-09-16
Supplement: pone.0137927.s004.pdf [file pone.0137927.s004.pdf]

S1 Table.

| Sample ID | Type | ANA | SMA | SLA | LKM1 | LC1 | anti-UNQ9419 | anti-CHAD |
|-----------|------|-----|-----|-----|------|-----|--------------|-----------|
| PT001*    | 1    | +   | +   | -   | -    | -   | -            | +         |
| PT002*    | 1    | +   | +   | -   | -    | -   | +            | +         |
| PT003*    | 1    | +   | +   | +   | -    | -   | +            | +         |
| PT004*    | 1    | +   | +   | na  | -    | -   | +            | +         |
| PT005*    | 1    | +   | +   | na  | -    | -   | -            | -         |
| PT006*    | 1    | +   | +   | -   | -    | -   | +            | +         |
| PT007*    | 1    | +   | +   | na  | -    | -   | -            | +         |
| PT008*    | 1    | +   | +   | na  | -    | -   | +            | +         |
| PT009*    | 1    | +   | +   | na  | -    | -   | -            | +         |
| PT010*    | 1    | +   | +   | na  | -    | -   | -            | -         |
| PT011*    | 1    | +   | +   | +   | +    | -   | -            | +         |
| PT012*    | 1    | +   | +   | na  | -    | -   | -            | +         |
| PT013*    | 1    | +   | +   | na  | -    | -   | +            | +         |
| PT014*    | 1    | +   | +   | -   | -    | -   | +            | +         |
| PT015*    | 1    | +   | +   | -   | -    | -   | +            | +         |
| PT016     | 1    | +   | -   | +   | -    | -   | -            | -         |
| PT017     | 2    | +   | -   | -   | +    | +   | -            | -         |
| PT018     | 2    | -   | -   | -   | +    | -   | -            | -         |
| PT019     | 1    | +   | -   | -   | -    | -   | -            | -         |
| PT020     | 1    | -   | +   | -   | -    | -   | +            | +         |
| PT021     | 1    | -   | +   | +   | -    | -   | -            | +         |
| PT022     | 1    | +   | -   | -   | -    | -   | +            | -         |
| PT023     | 1    | +   | -   | -   | -    | na  | -            | +         |
| PT024     | 1    | +   | +   | -   | -    | na  | -            | -         |
| PT025     | 1    | +   | -   | -   | -    | na  | +            | +         |
| PT026     | 1    | -   | na  | -   | -    | na  | +            | +         |
| PT027     | 1    | +   | -   | na  | -    | -   | -            | -         |
| PT028     | 1    | +   | +   | na  | -    | -   | -            | +         |
| PT029     | 1    | -   | +   | +   | -    | -   | -            | +         |
| PT030     | 2    | -   | -   | na  | +    | -   | -            | +         |
| PT031     | 1    | +   | +   | na  | -    | -   | +            | +         |
| PT032     | 1    | +   | +   | na  | -    | -   | +            | +         |
| PT033     | 1    | +   | -   | na  | -    | -   | +            | +         |
| PT034     | 1    | +   | -   | na  | -    | -   | +            | +         |
| PT035     | 1    | +   | +   | na  | -    | -   | -            | +         |
| PT036     | 2    | -   | -   | -   | +    | -   | +            | +         |
| PT037     | 1    | +   | +   | -   | -    | -   | +            | -         |
| PT038     | 1&2  | +   | -   | na  | +    | -   | +            | +         |
| PT039     | 1&2  | -   | +   | na  | +    | -   | +            | -         |
| PT040     | 1    | +   | -   | na  | -    | -   | -            | -         |
| PT041     | 1    | -   | +   | -   | -    | -   | -            | -         |
| PT042     | 2    | -   | -   | -   | +    | +   | +            | -         |
| PT043     | 1    | +   | +   | na  | -    | -   | +            | -         |
| PT044     | 1    | -   | +   | na  | -    | -   | -            | -         |
| PT045     | 1    | -   | +   | +   | -    | -   | -            | -         |
| PT046     | 2    | -   | -   | -   | +    | -   | -            | -         |
| PT047     | 1    | +   | -   | +   | -    | -   | -            | -         |
| PT048     | 1    | -   | -   | +   | -    | -   | +            | +         |
| PT049     | 1    | +   | -   | -   | -    | -   | +            | +         |
| PT050     | 1    | -   | +   | na  | -    | -   | +            | +         |
| PT051     | 1    | -   | +   | na  | -    | -   | -            | +         |
| PT052     | 2    | -   | -   | -   | +    | -   | -            | -         |
| PT053     | 2    | -   | -   | -   | +    | -   | +            | +         |
| PT054     | 1    | +   | +   | na  | -    | -   | -            | -         |
| PT055     | 2    | -   | -   | -   | +    | -   | +            | +         |

ANA: anti-nuclear antibodies; SMA: anti-smooth-muscle antibodies; LKM1: liver/kidney microsomal antibody type 1; SLA: anti-soluble liver antigen; LC1: Anti-liver cytosolic antigen type 1 antibody.

\*Patient Sera used in the discovery phase.
