# Supplementary material for: Two of Them Do It Better: Novel Serum Biomarkers Improve Autoimmune Hepatitis Diagnosis
Source: PLoS One. 2015 Sep 16;10(9):e0137927. doi: 10.1371/journal.pone.0137927 (PMC4573979; doi:10.1371/journal.pone.0137927)
Supplement: S2 Table — (PDF) [file pone.0137927.s005.pdf]

**S2 Table.**

| Similarity evaluation                                                                                                                                                                                    |
|----------------------------------------------------------------------------------------------------------------------------------------------------------------------------------------------------------|
| <i>INPUT</i> : a dataset, D, with A features (autoantigens) and N instances ( $n_{AIH}=15$ and $n_{HD}=78$ measurements).<br>R is the number of reduced subsets                                          |
| For each run $i, i=1,2,\dots,R$                                                                                                                                                                          |
| (1) randomly partition data into reduced subsets $D_i$ including all positive instances ( $n_{AIH}=15$ ) and a set of negative instances ( $\tilde{n}_{HD}=24$ )                                         |
| (2) perform feature selection                                                                                                                                                                            |
| (i) train y classifiers ( $y=2$ ) with a <i>10 fold cross-validation</i> on the reduced subset                                                                                                           |
| (ii) obtain a ranked list $L_{iy}$                                                                                                                                                                       |
| End                                                                                                                                                                                                      |
| Finally, calculate all pairwise similarity comparison ( $R(R-1)/2$ possible comparisons) and averaged them to obtain an overall evaluation of the degree of similarity, S, between the autoantigen lists |
| <i>OUTPUT</i> : similarity index $S_{tot}$ for each considered classifier                                                                                                                                |
